# Supplementary material
Source: publisher figshare collection journal article supplement (https://acs.figshare.com/ndownloader/files/14976317)
Supplement: Supplementary file 1 [file 14976317]

## Supplementary information

### **Dextran-Conjugated Caged siRNA Nanoparticles for Photochemical Regulation of RNAi-Induced Gene Silencing in Cells and Mice**

*Changmai Chen<sup>†, ‡</sup>, Zhongyu Wang<sup>†, ‡</sup>, Jinhao Zhang<sup>†</sup>, Xinli Fan<sup>†</sup>, Luzheng Xu<sup>§</sup> and Xinjing Tang<sup>†, \*</sup>*

<sup>†</sup> State Key Laboratory of Natural and Biomimetic Drugs, Beijing Key Laboratory of Molecular Pharmaceuticals and New Drug Delivery Systems, School of Pharmaceutical Sciences, Peking University, Beijing, 100191, China

<sup>§</sup> Medical and Health Analytical Center, Peking University, Beijing, 100191, China

<sup>#</sup>These authors have equal contributions

<sup>\*</sup> Correspondence

Prof. Xinjing Tang, State Key Laboratory of Natural and Biomimetic Drugs, School of Pharmaceutical Sciences, Peking University, Beijing 100191, China.

Tel: +86-010-82805635

E-mail: [xinjingt@bjmu.edu.cn](mailto:xinjingt@bjmu.edu.cn)

**Table S1.** The sequences of native and caged thiol-modified oligonucleotides used in this study

| Target | Name             | Sequence (5')                     |
|--------|------------------|-----------------------------------|
| GFP    | SG               | GAA CGG CAU CAA GGU GAA CTT       |
|        | AG               | GUU CAC CUU GAU GCC GUU CTT       |
|        | SS- <i>p</i> -SG | SS-PL-GAA CGG CAU CAA GGU GAA CTT |
|        | SS- <i>p</i> -AG | SS-PL-GUU CAC CUU GAU GCC GUU CTT |
| Eg5    | SE               | CAA CAA GGA UGA AGU CUA UTT       |
|        | AE               | AUA GAC UUC AUC CUU GUU GTT       |
|        | SS- <i>p</i> -SE | SS-PL-CAA CAA GGA UGA AGU CUA UTT |
|        | SS- <i>p</i> -AE | SS-PL-AUA GAC UUC AUC CUU GUU GTT |

S, sense RNA strand; A, antisense RNA strand; G, GFP; E, Eg5; SS, 5'-thiol modifier C6 S-S; *p* or PL, photolinker

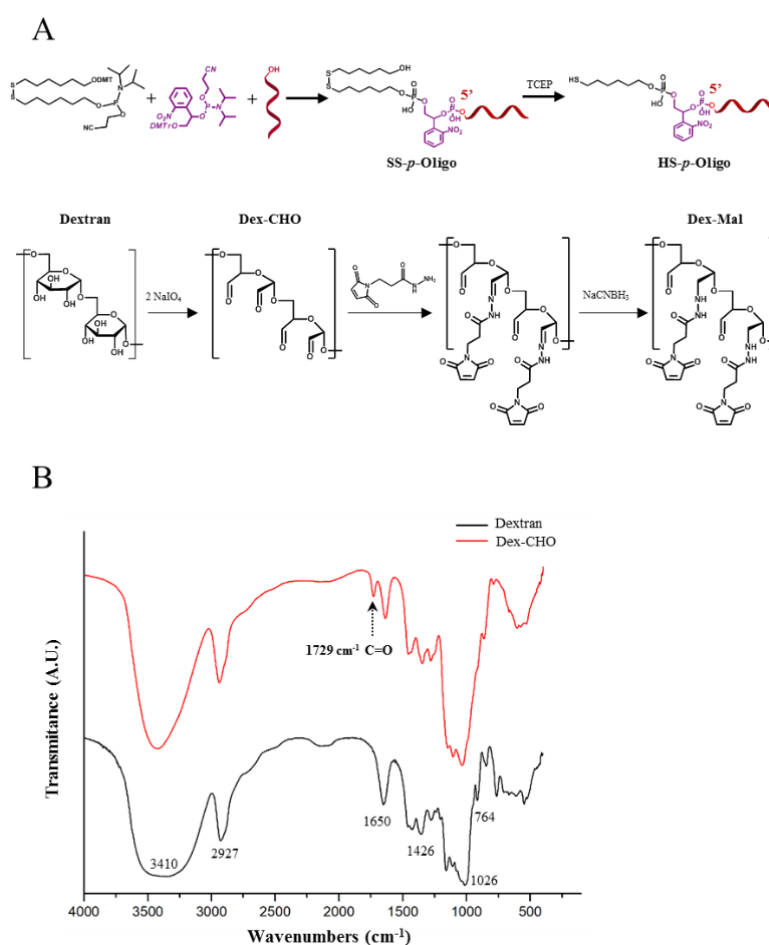

**Figure S1.** Synthesis of thiol-modified caged siRNAs and maleimide-functionalized of dextran (A) and analysis of the aldehyde groups of dextran (Dex-CHO) by FTIR (B).

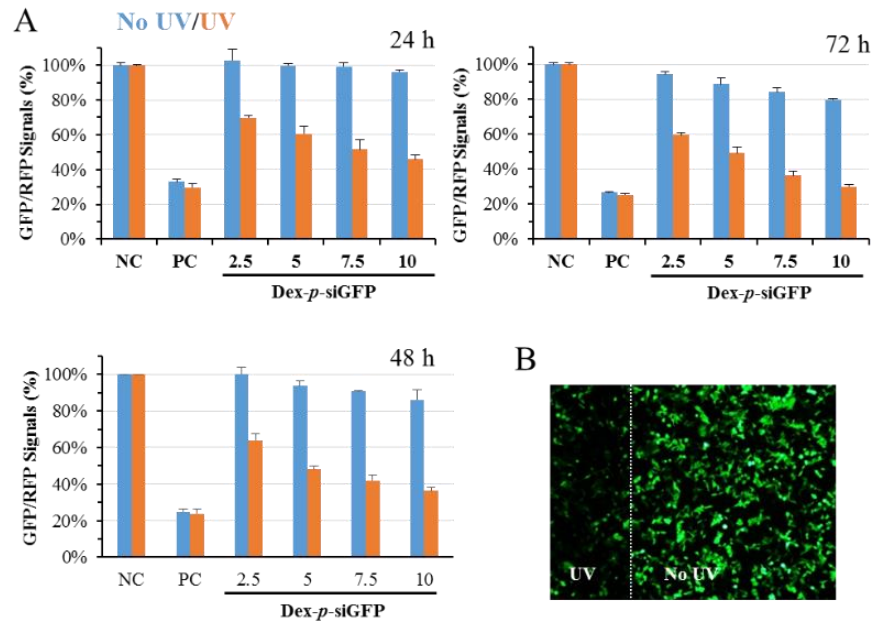

**Figure S2.** Photoregulation of GFP gene silencing using the caged Dex-*p*-siGFP nanoparticles. Time- and dose-dependent photomodulation GFP expression quantified using flow cytometry (A). Patterning experiments revealed that Dex-*p*-siRNA could spatial control of gene expression via simple light irradiation (B). PC, positive control siGFP (AG/SG)

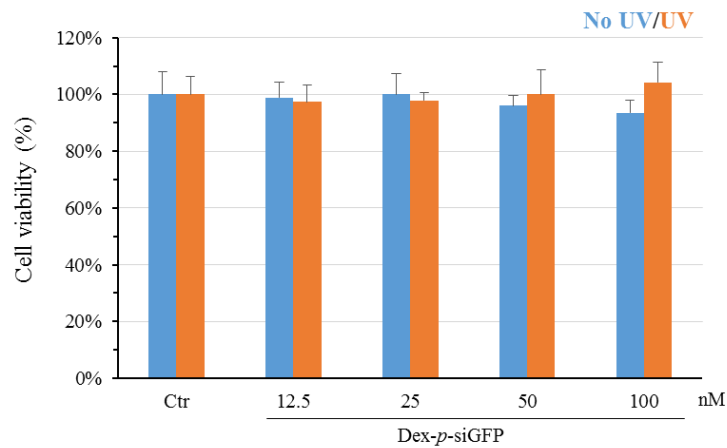

**Figure S3.** The effect of dextran-conjugated caged siGFP on cell proliferation for 48 h at the concentration of 12.5-100 nM.

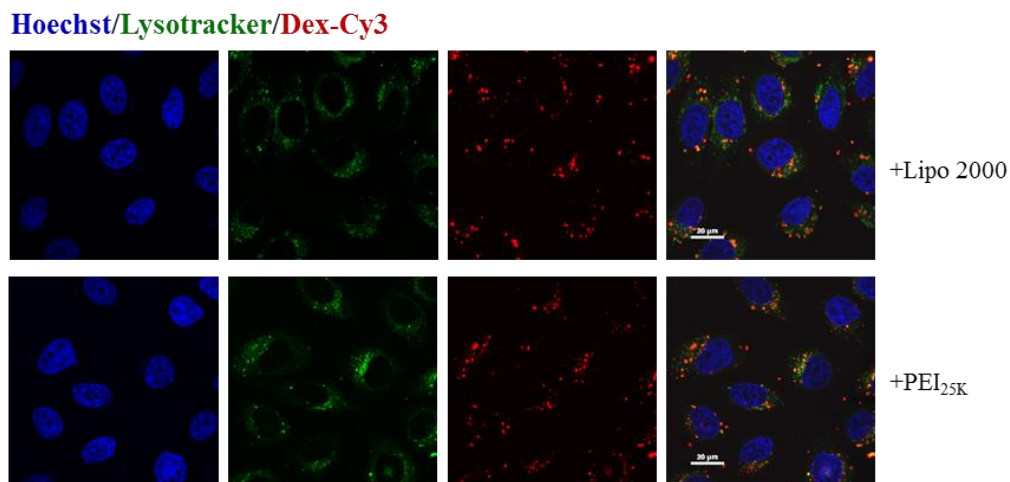

**Figure S4.** Subcellular localization of Cy3-labeled dextran-conjugated caged siGFP (Dex-Cy3). The cells were stained with Lysotracker green and Hoechst 33342 after 5 h transfection with Lipo 2000 or PEI<sub>25K</sub> agent.

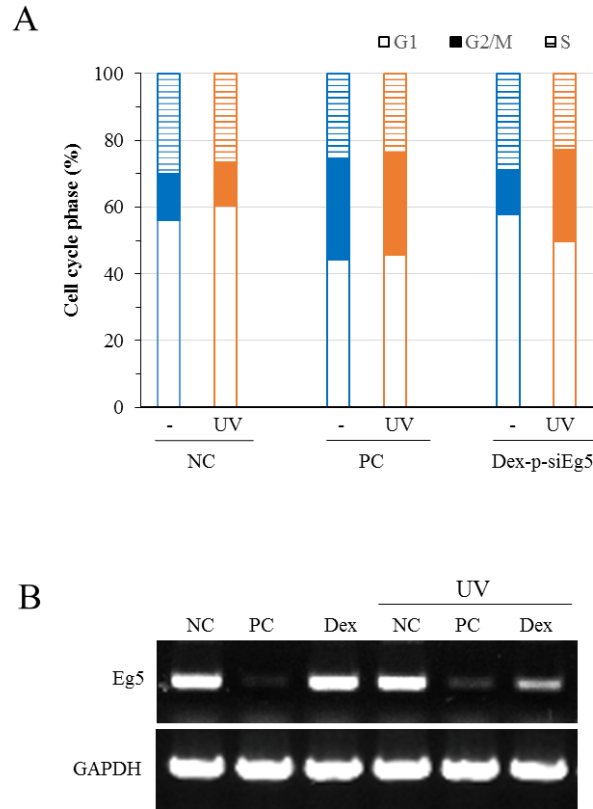

**Figure S5.** Photochemical regulation of Eg5 gene expression with the caged Dex-*p*-siEg5 nanoparticles. Cell cycle perturbation and analysis of mitotic arrest stained with propidium iodide (A). Photochemical regulation of Eg5 gene expression by RT-PCR (B). PC, positive control siEg5 (AE/SE); NC, negative control.

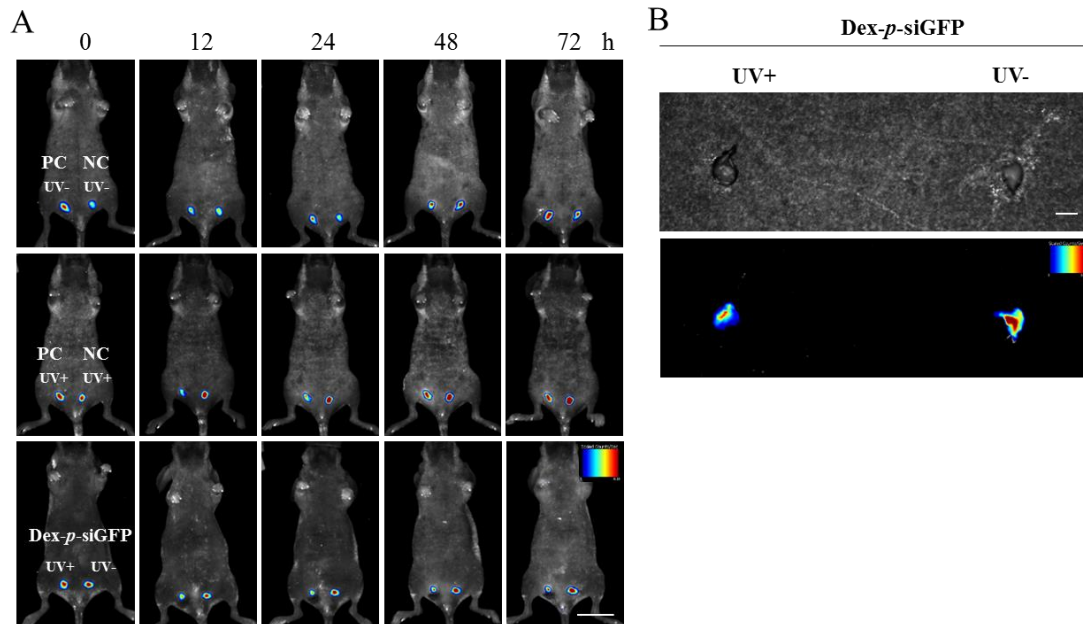

**Figure S6.** Photochemical regulation of GFP gene expression *in vivo* with the caged Dex-*p*-siGFP nanoparticles. *In vivo* real-time fluorescence images of tumor-bearing mice at different time points after intratumoral administration of 3 nmol of the native siRNA or caged Dex-*p*-siRNA nanoparticles. Scale bar = 1.5 cm. (A). Representative images of sectioned tumors injected with caged Dex-*p*-siRNA nanoparticles and left tumor was subjected to light irradiation (UV+). Bright field image (Up) and Overlapped image (down) (B). PC, positive control siGFP (AG/SG); NC, negative control, PBS buffer injection. Scale bar = 4 mm.

**Table S2.** The fluorescence intensity of tumor was quantified at different time points

| Time | NC UV-                 | NC UV+               | PC UV-               | PC UV+               | Dex UV-              | Dex UV+              |
|------|------------------------|----------------------|----------------------|----------------------|----------------------|----------------------|
| 0 h  | 7536666.6±<br>355574   | 12686667±<br>4588740 | 16733333±<br>1650253 | 21200000±<br>1272792 | 12800000±<br>3026549 | 17566667±<br>3111270 |
| 12 h | 7790000±<br>427200     | 13866667±<br>4219400 | 6000000±<br>3613475  | 5573333±<br>2673431  | 11053333±<br>3022339 | 5750000±<br>1414214  |
| 24 h | 7873333.3±<br>816843   | 15733333±<br>5896892 | 5956667±<br>4422401  | 7910000±<br>3496613  | 14370000±<br>4989760 | 7910000±<br>4313351  |
| 48 h | 11113333.3±<br>2358502 | 18900000±<br>3459769 | 7949000±<br>5805894  | 12410000±<br>4261842 | 15403333±<br>4545881 | 8343333±<br>3323402  |
| 72 h | 10566666.6±<br>472581  | 18533333±<br>4384442 | 13076667±<br>6742895 | 16966667±<br>8197764 | 15733333±<br>3000556 | 11396667±<br>2757716 |

## $^1\text{H}$ NMR and $^{31}\text{P}$ NMR spectra of photolinker phosphoramidite

The phosphoramidite of photolabile linker (PL or p) was synthesized according to standard phosphoramidite synthetic protocol<sup>1, 2</sup>.  $^1\text{H}$  NMR (400 MHz) and  $^{31}\text{P}$  NMR (162 MHz) spectra were taken on Bruker AVANCE III-400 spectrometers and standardized to the NMR solvent peak, chemical shifts were reported in parts per million (ppm).  $^1\text{H}$  NMR (400 MHz,  $\text{CDCl}_3$ )  $\delta$  7.91 (dd,  $J$  = 8.2, 1.3 Hz, 1H), 7.85 – 7.81 (m, 1H), 7.59 (t,  $J$  = 7.6 Hz, 1H), 7.42 (td,  $J$  = 8.0, 7.5, 1.5 Hz, 3H), 7.33 – 7.29 (m, 3H), 7.21 (t,  $J$  = 7.2 Hz, 1H), 6.82 (dd,  $J$  = 9.0, 2.8 Hz, 4H), 5.81 (ddd,  $J$  = 10.6, 6.8, 3.2 Hz, 1H), 3.94 – 3.85 (m, 2H), 3.81 (s, 6H), 3.50 (dt,  $J$  = 10.4, 6.8 Hz, 1H), 3.45 (dd,  $J$  = 9.5, 3.2 Hz, 1H), 3.28 (dd,  $J$  = 9.5, 6.9 Hz, 1H), 2.65 – 2.46 (m, 2H), 1.17 (d,  $J$  = 6.8 Hz, 6H), 0.85 (d,  $J$  = 6.8 Hz, 6H).  $^{31}\text{P}$  NMR (162 MHz,  $\text{CDCl}_3$ )  $\delta$  149.85 (d,  $J$  = 9.6 Hz).

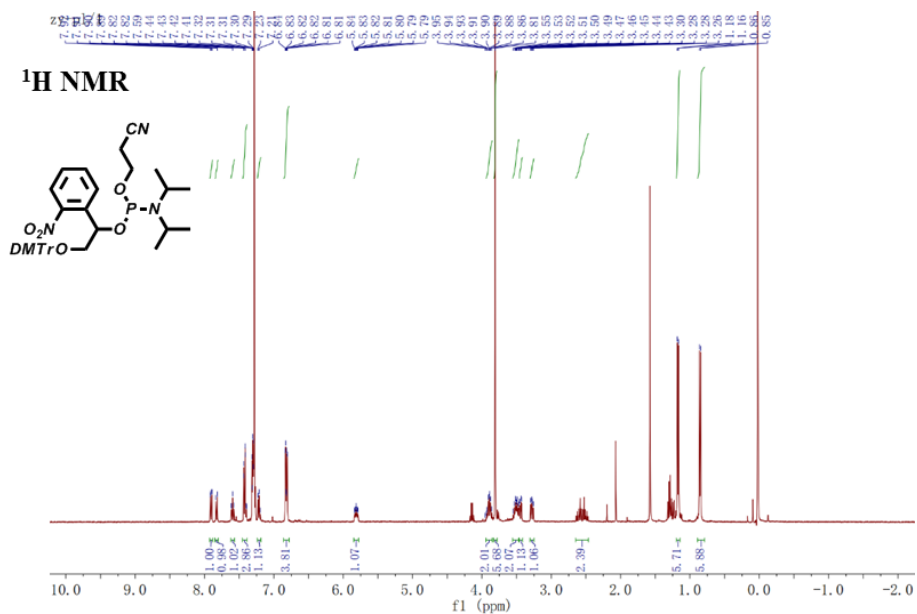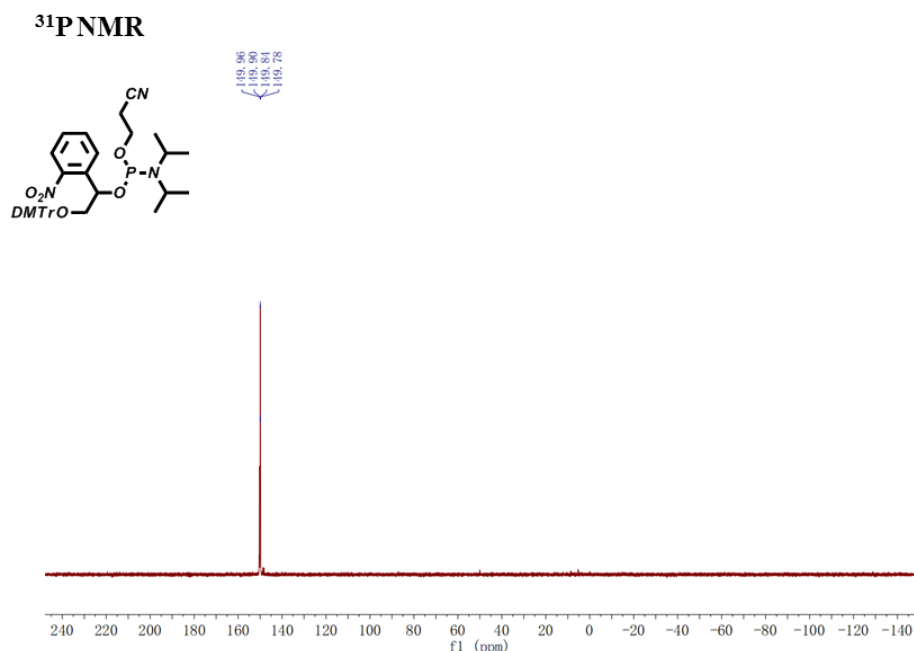

The partial oxidation of dextran (Dex-CHO) and maleimide-functionalized of dextran (Dex-Mal) were prepared according to the previous reported procedures<sup>3</sup>. The aldehyde groups of dextran (Dex-CHO)  $^1\text{H}$  NMR (400 MHz,  $\text{D}_2\text{O}$ )  $\delta$  9.17 (s, 1H),  $\delta$  8.36 (s, 1H). The maleimide groups of dextran (Dex-Mal)  $^1\text{H}$  NMR (400 MHz, Deuterium Oxide)  $\delta$  6.25 (d,  $J = 13.2$  Hz, 1H), 5.87 (d,  $J = 12.9$  Hz, 1H).

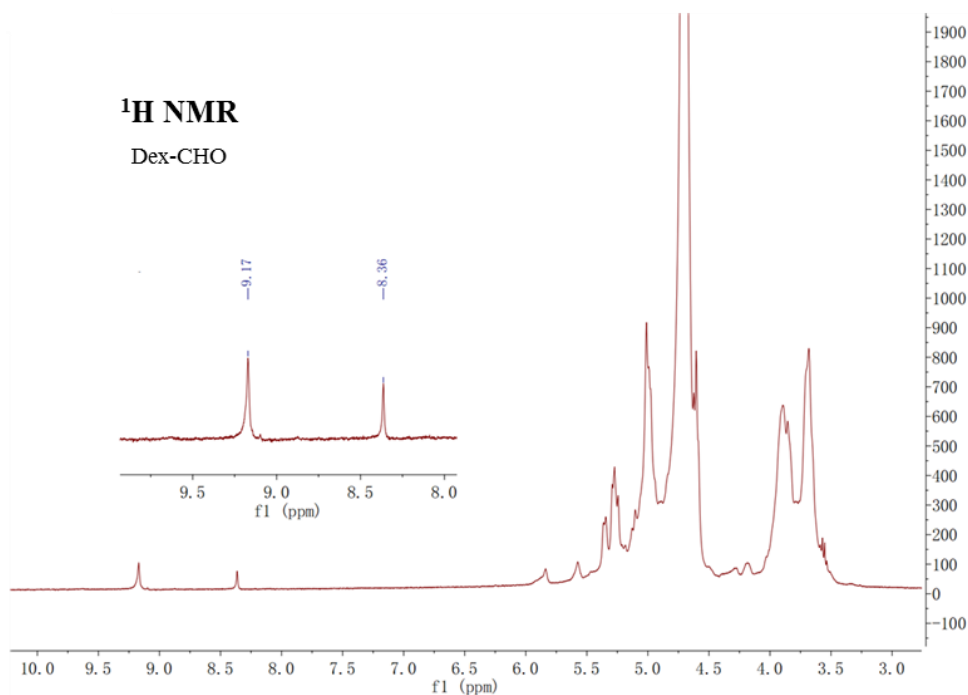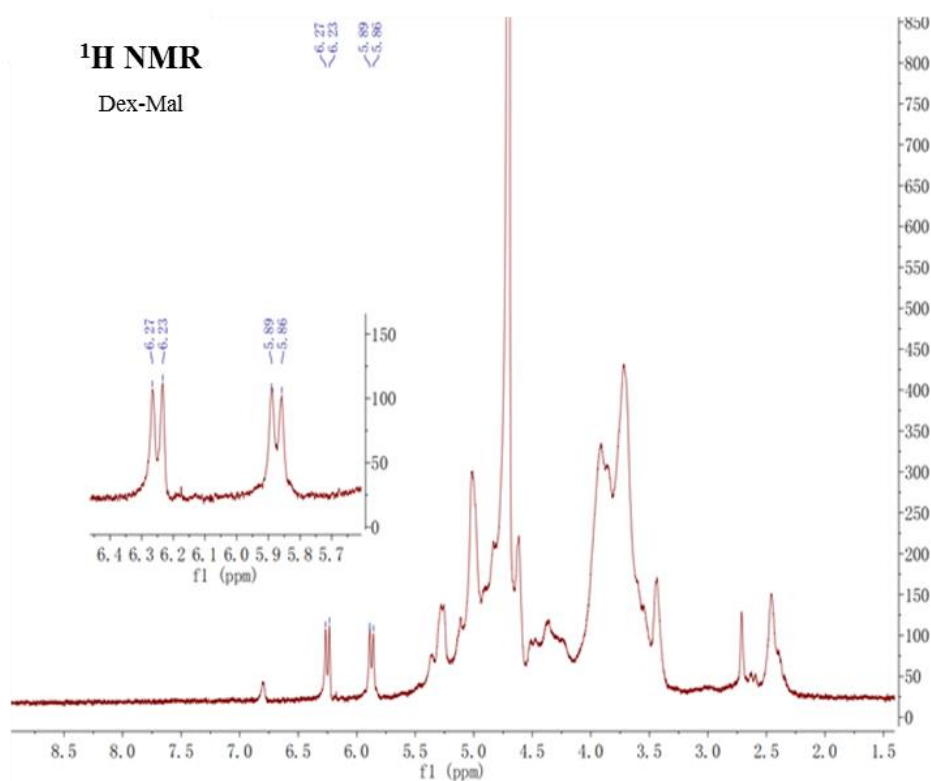

ESI-MS of native or thiol-modifier RNA oligonucleotides

These native or 5' thiol-modified caged RNA oligonucleotides targeting GFP and Eg5 (SS-*p*-oligos) were further purified using reversed-phase HPLC and characterized by ESI-MS. The sequences of caged thiol-modified oligonucleotides used in this study.

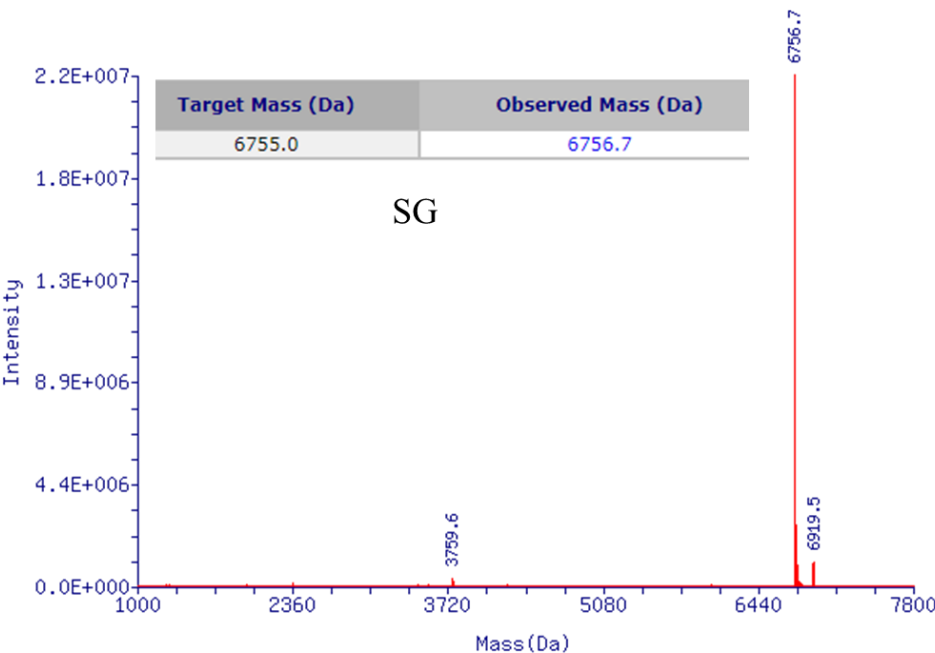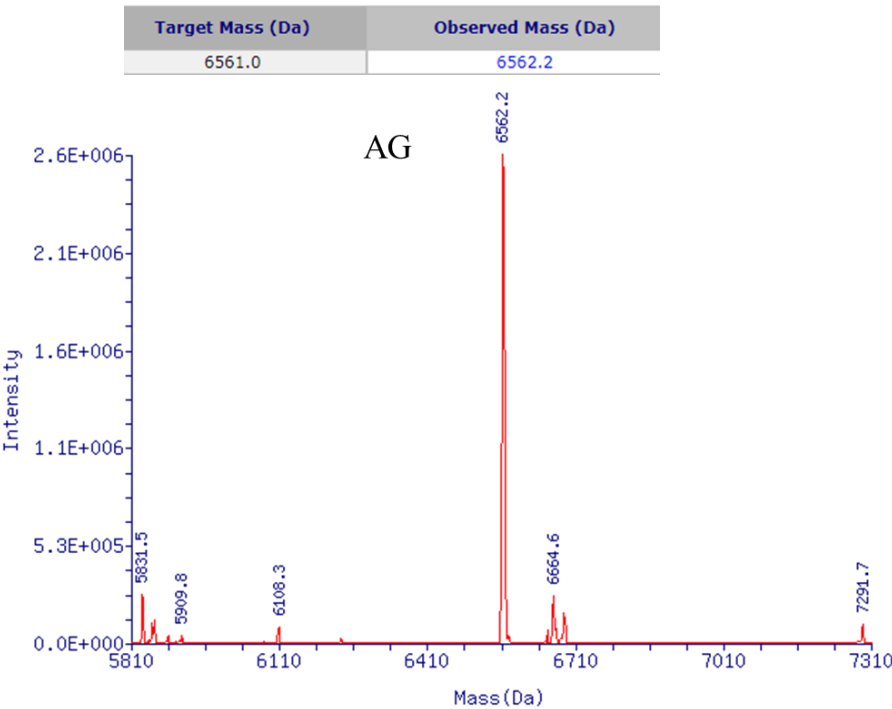



### SS-p-SG

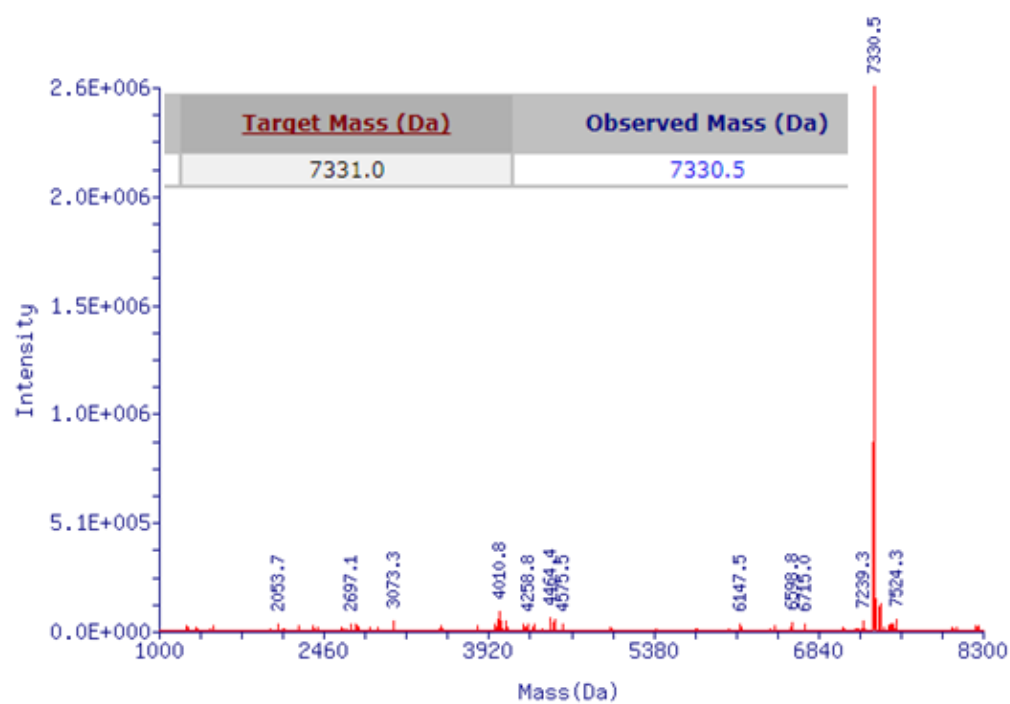

### SS-p-AG

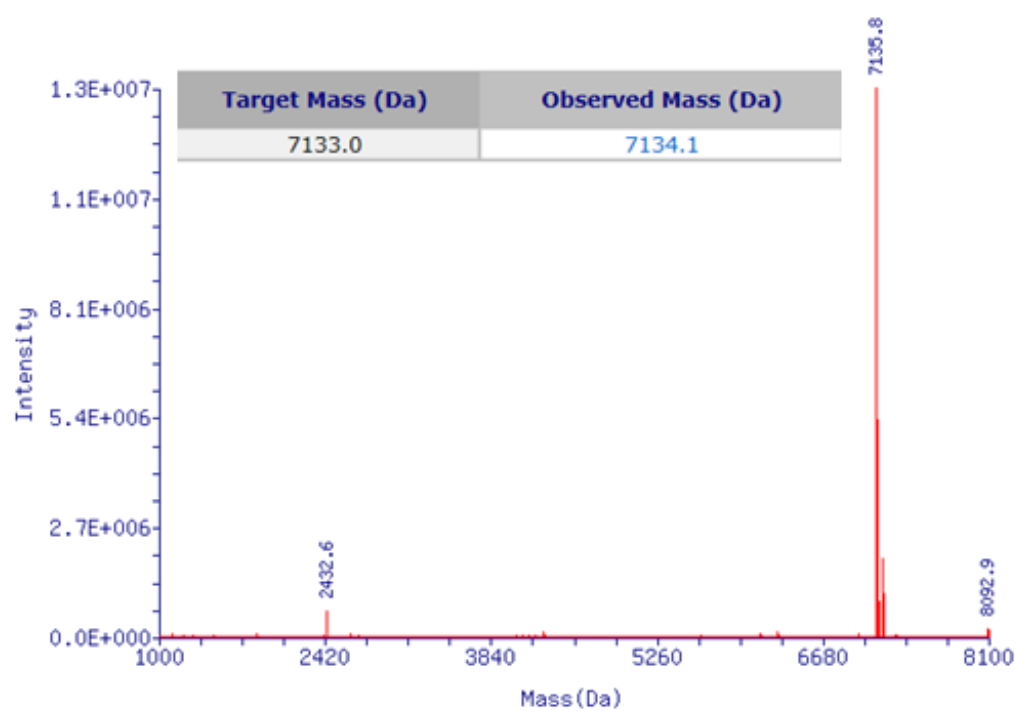

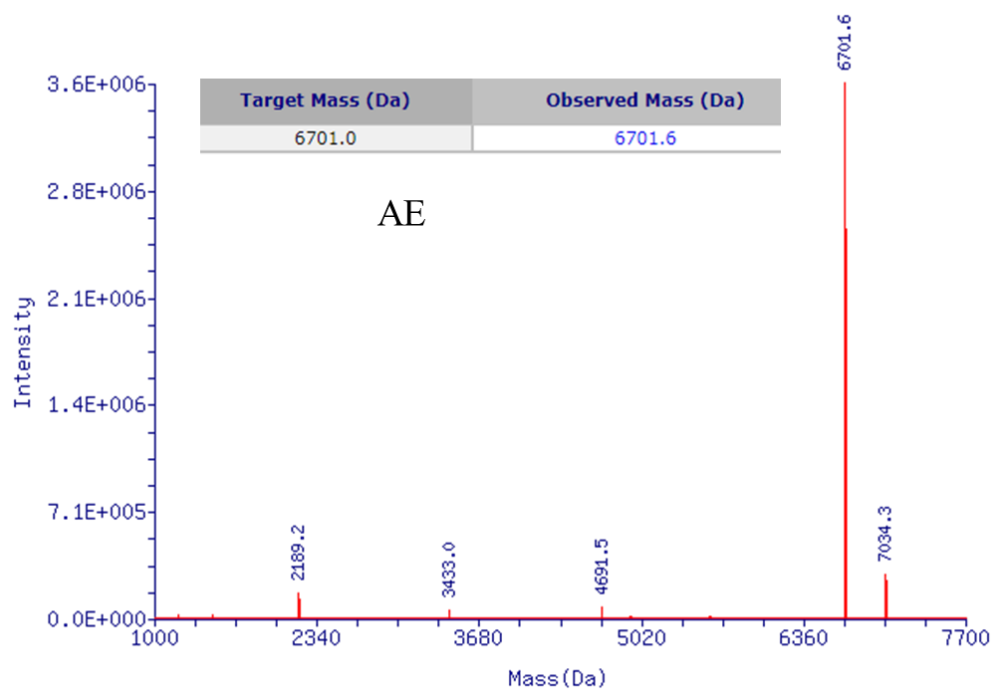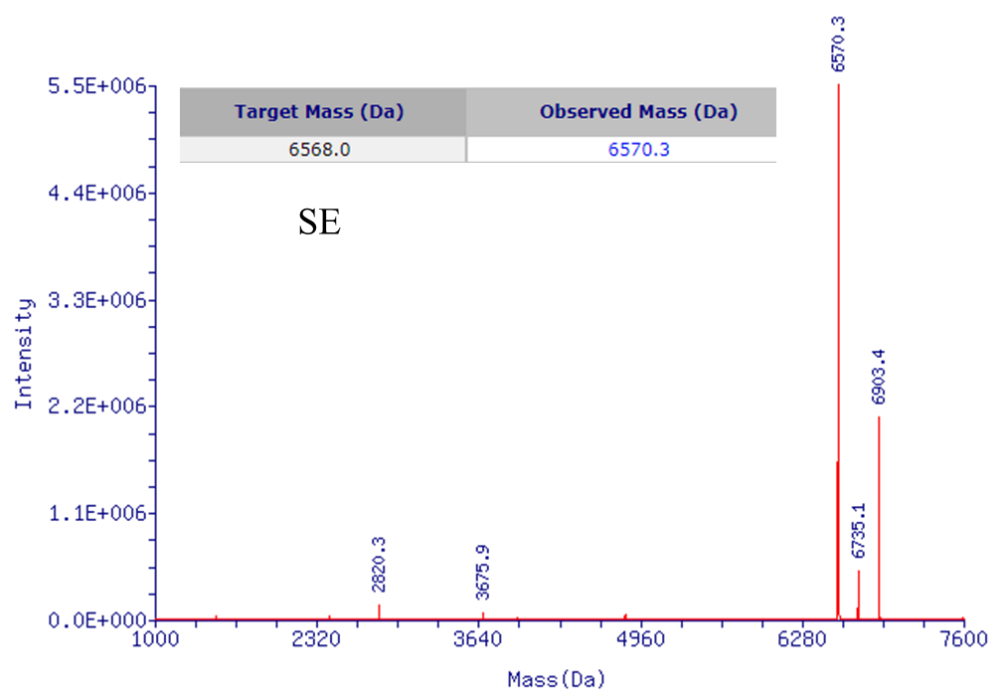

### SS-*p*-SE

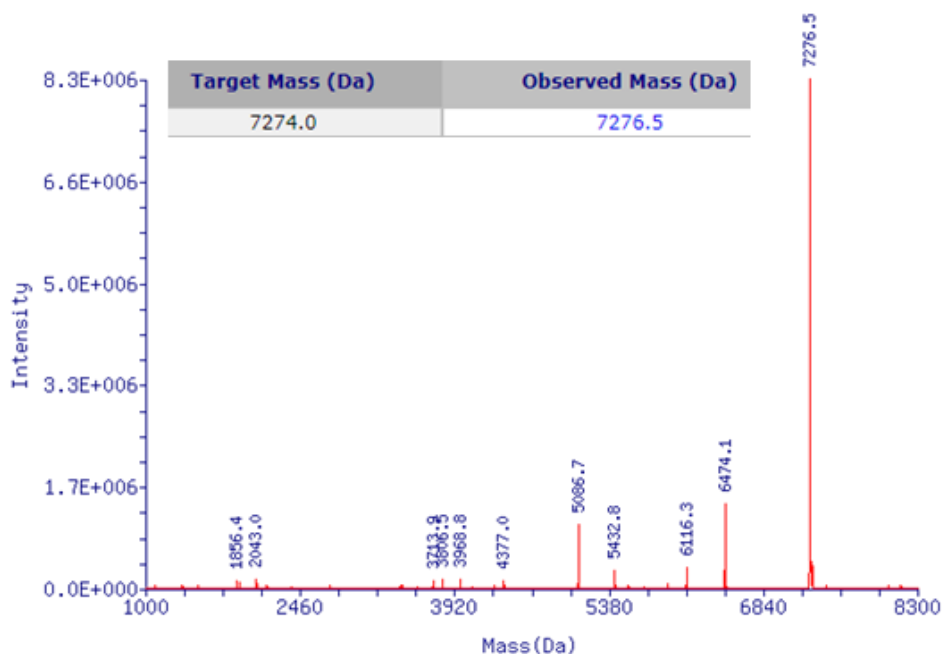

### SS-*p*-AE

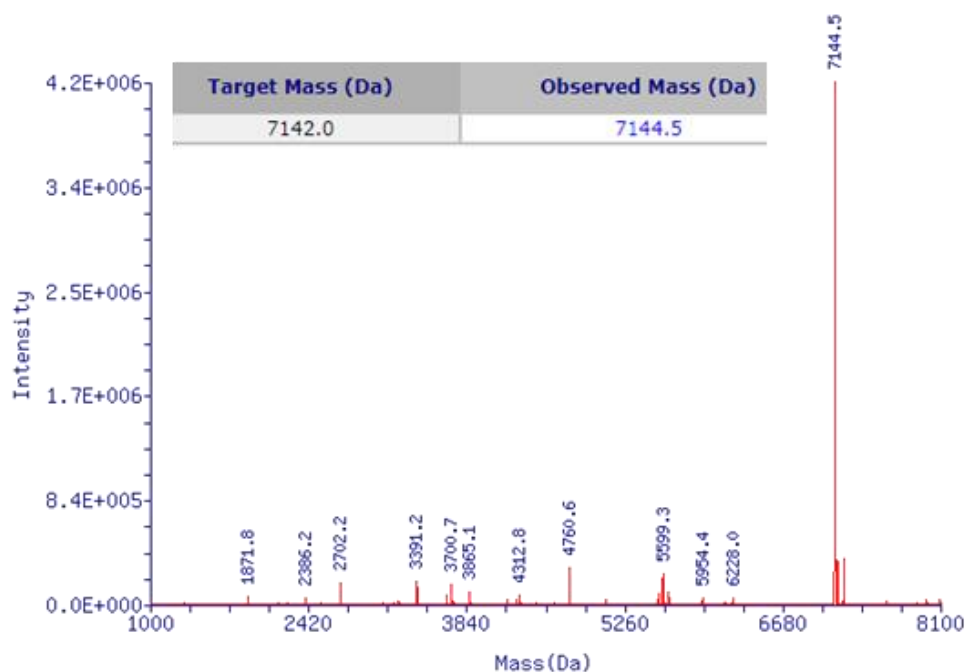

### References

- (1) Yang, J., Chen, C., and Tang, X. (2018) Cholesterol-Modified Caged siRNAs for Photoregulating Exogenous and Endogenous Gene Expression. *Bioconjugate Chem* 29, 1010-1015.
- (2) Ji, Y., Yang, J., Wu, L., Yu, L., and Tang, X. (2016) Photochemical Regulation of Gene Expression Using Caged siRNAs with Single Terminal Vitamin E Modification. *Angew Chem Int Ed Engl* 55, 2152-6.
- (3) Pan, J.-f., Yuan, H.-f., Guo, C.-a., Liu, J., Geng, X.-h., Fei, T., Li, S., Fan, W.-s., Mo, X.-m. *et al.* (2015) One-step cross-linked injectable hydrogels with tunable properties for space-filling scaffolds in tissue engineering. *RSC Adv.* 5, 40820-40830.
